# Supplementary material for: Interplay of adherens junctions and matrix proteolysis determines the invasive pattern and growth of squamous cell carcinoma
Source: eLife. 2023 Mar 9;12:e76520. doi: 10.7554/eLife.76520 (PMC9998089; doi:10.7554/eLife.76520)
Supplement: Figure 1—source data 1. [file elife-76520-fig1-data1.xlsx]

## Sheet: Fig1b
I	II	III
2	2	2
3	3	2
4	3	3
3	3	2
3	2	2
4	2	3
3	3	3
3	3	3
3	4	3
2	4	3
3	3	2
4	5	2
4	4	2
3	3	3
3	4	3
4	6	2
4	5	3
4	6	2
5	4	2
4	6	3
4	3	3
1	5	2
6	6	3
6	4	4
5	5	4
8	3	3
5	3	3
6	2	4
7	4	3
5	3	2
6	2	1
7	3	2
9	2	2
7	6	5
6	2	4
5	2	2
5	2	3
6	2	5
6	3	5
8	2	4
5	3	4
5	6	3
7	3	2
6	3	3
7	4	4
7	1	3
6	4	3
6	3	1
6	2	1
6	2	2
5	2	3
5	2	3
5	3	2
6	4	2
2	3	2
4	5	1
8	3	3
6	2	2
3	4	2
5	3	1
4	5	3
6	4	2
7	3	5
5	3	3
7	2	1
6	3	4
5	4	3
2	4
4	5
6	5
7	5
5	4
7	6
4	5
5	2
5	4
3	5
2	4
6	3
6	5
5	3
7	3
5	4
5	2
5	2
3	4
4	3
4	3
4	3
7	3
4	5
5	3
5	5
7	3
4	4
6	1
6	2
6	2
6	5
4	3
3	2
8	2
7	1
6	4
7	4
4	5
3	5
7	6
7	6
6	4
5	3
5	5
6	4
8	3
5	3
	3
	2
	3
	6
	3
	3
	5
	6
	6
	5
	4
	6
	4
	3
	3
	4
	3
	3
	4
	4
	3
	5
	3
	3
	3
	2
	3
	2
	3
Number of families	1
Number of comparisons per family	3
Alpha	0.05
Tukey's multiple comparisons test	Mean Diff.	95.00% CI of diff.	Significant?	Summary	Adjusted P Value
I vs. II	1.57	1.174 to 1.966	Yes	****	<0.0001	A-B
I vs. III	2.388	1.901 to 2.875	Yes	****	<0.0001	A-C
II vs. III	0.8183	0.3500 to 1.287	Yes	***	0.0001	B-C
Test details	Mean 1	Mean 2	Mean Diff.	SE of diff.	n1	n2	q	DF
I vs. II	5.104	3.535	1.57	0.1682	115	144	13.2	323
I vs. III	5.104	2.716	2.388	0.2067	115	67	16.34	323
II vs. III	3.535	2.716	0.8183	0.1989	144	67	5.819	323
