# Supplementary material for: Interplay of adherens junctions and matrix proteolysis determines the invasive pattern and growth of squamous cell carcinoma
Source: eLife. 2023 Mar 9;12:e76520. doi: 10.7554/eLife.76520 (PMC9998089; doi:10.7554/eLife.76520)
Supplement: Figure 3—source data 1. [file elife-76520-fig3-data1.xlsx]

## Sheet: Fig3d Spheroid tapering
MMP14 KO	WT	MMP14 OE
1.31609	1.31502	1.16321
1.38828	1.553	1.80673
1.07607	0.724052	2.27018
1.58494	1.16821	1.02504
0.963105	1.33049	2
1.00731	1.20049	3.03143
1.14466	1.2981	1.42382
1.01388	1.32005	2.41086
1.69443	1.49865	1.49872
0.775205	2.02984	1.63727
1.48963	1.06297	1.82241
1.30822	1.33913	1.09
1.13193	1.06216	3.39401
1.13492	1.70831	3.25394
1.22661	1.5707	1.09231
1.41882	1.88579	1.68758
1.07526	1.52107	2.05312
1.08852	1.01364	1.62252
1.2349		2.13751
1.51569		1.47836
1.42193		1.5182
0.853485
0.850057
1.1999
Table Analyzed	Tapering WT vs MKO and MOE Sph
Data sets analyzed	A-C
ANOVA summary
F	12.92
P value	<0.0001
P value summary	****
Significant diff. among means (P < 0.05)?	Yes
R square	0.301
Brown-Forsythe test
F (DFn, DFd)	6.158 (2, 60)
P value	0.0037
P value summary	**
Are SDs significantly different (P < 0.05)?	Yes
Bartlett's test
Bartlett's statistic (corrected)	24.31
P value	<0.0001
P value summary	****
Are SDs significantly different (P < 0.05)?	Yes
ANOVA table	SS	DF	MS	F (DFn, DFd)	P value
Treatment (between columns)	5.358	2	2.679	F (2, 60) = 12.92	P<0.0001
Residual (within columns)	12.44	60	0.2074
Total	17.8	62
Data summary
Number of treatments (columns)	3
Number of values (total)	63
Number of families	1
Number of comparisons per family	3
Alpha	0.05
Tukey's multiple comparisons test	Mean Diff.	95.00% CI of diff.	Significant?	Summary	Adjusted P Value
MMP14 KO vs. WT	-0.162	-0.5033 to 0.1792	No	ns	0.4929	A-B
MMP14 KO vs. MMP14 OE	-0.6723	-0.9993 to -0.3453	Yes	****	<0.0001	A-C
WT vs. MMP14 OE	-0.5103	-0.8618 to -0.1587	Yes	**	0.0026	B-C
Test details	Mean 1	Mean 2	Mean Diff.	SE of diff.	n1	n2	q	DF
MMP14 KO vs. WT	1.205	1.367	-0.162	0.142	24	18	1.614	60
MMP14 KO vs. MMP14 OE	1.205	1.877	-0.6723	0.1361	24	21	6.987	60
WT vs. MMP14 OE	1.367	1.877	-0.5103	0.1463	18	21	4.933	60

## Sheet: Fig3d Spheroid width
WT	MMP14KO	MMP14OE
28.3539	17.1978	37.7958
16.1811	21.5204	20.8137
40.7446	26.8927	27.3393
27.7634	10.7251	34.9121
30.2483	14.0929	24.0353
29.7259	16.7368	34.5122
21.3621	17.8133	17.28
34.6405	15.5364	44.4242
32.1136	13.4839	21.7241
13.7611	13.0202	46.918
25.1371	20.7758	48.2439
25.1429	13.8973	52.2038
34.4177	17.8142	32.9701
27.6907	24.662	53.3571
26.6154	18.6269	17.2568
32.5191	14.4478	77.0152
25.3667	12.4884	37.5116
33.1739	27.0682	17.6235
17.1837	18.2787	22.129
26.75	14.9173	33.7711
12.717	17.9484
19.1364	21.272
Table Analyzed	Data 1
Data sets analyzed	A-C
ANOVA summary
F	16.11
P value	<0.0001
P value summary	****
Significant diff. among means (P < 0.05)?	Yes
R square	0.3457
Brown-Forsythe test
F (DFn	DFd)	9.354 (2	61)
P value	0.0003
P value summary	***
Are SDs significantly different (P < 0.05)?	Yes
Bartlett's test
Bartlett's statistic (corrected)	29.13
P value	<0.0001
P value summary	****
Are SDs significantly different (P < 0.05)?	Yes
ANOVA table	SS	DF	MS	F (DFn	DFd)	P value
Treatment (between columns)	3174	2	1587	F (2	61) = 16.11	P<0.0001
Residual (within columns)	6009	61	98.51
Total	9184	63
Data summary
Number of treatments (columns)	3
Number of values (total)	64
Number of families	1
Number of comparisons per family	3
Alpha	0.05
Tukey's multiple comparisons test	Mean Diff.	95.00% CI of diff.	Significant?	Summary	Adjusted P Value
WT vs. MMP14KO	8.706	1.517 to 15.89	Yes	*	0.0138	A-B
WT vs. MMP14OE	-8.694	-16.06 to -1.328	Yes	*	0.0168	A-C
MMP14KO vs. MMP14OE	-17.4	-24.77 to -10.03	Yes	****	<0.0001	B-C
Test details	Mean 1	Mean 2	Mean Diff.	SE of diff.	n1	n2	q	DF
WT vs. MMP14KO	26.4	17.69	8.706	2.993	22	22	4.114	61
WT vs. MMP14OE	26.4	35.09	-8.694	3.066	22	20	4.01	61
MMP14KO vs. MMP14OE	17.69	35.09	-17.4	3.066	22	20	8.025	61

## Sheet: Fig3d Spheroid length
WT	MMP14KO	MMP14OE
161.059	94.976	71.702
96.047	197.747	101.071
51.74	150.869	67.449
105.995	175.795	90.758
128.298	75.616	54.642
75.766	50.611	40.025
45.541	132.614	49.739
88.22	75.007	65.863
119.581	97.792	57.689
40.792	85.818	60.745
199.548	74.103	40
50.804	181.066	156.057
125.487	52.442	66.343
48.748	102.821	139.548
112.25	149.149	73.053
165.352	74.344	65.803
191.852	81.127	85
95.495	53.413	84.831
147.993	103.524	92.201
173.353	80.498	60.471
82.23	145.077
124.923	143.127
113.192	85.259
	136.486
Table Analyzed	Data 1
Data sets analyzed	A-C
ANOVA summary
F	4.626
P value	0.0133
P value summary	*
Significant diff. among means (P < 0.05)?	Yes
R square	0.1263
Brown-Forsythe test
F (DFn	DFd)	2.798 (2	64)
P value	0.0684
P value summary	ns
Are SDs significantly different (P < 0.05)?	No
Bartlett's test
Bartlett's statistic (corrected)	4.258
P value	0.1189
P value summary	ns
Are SDs significantly different (P < 0.05)?	No
ANOVA table	SS	DF	MS	F (DFn	DFd)	P value
Treatment (between columns)	15609	2	7805	F (2	64) = 4.626	P=0.0133
Residual (within columns)	107967	64	1687
Total	123576	66
Data summary
Number of treatments (columns)	3
Number of values (total)	67
Number of families	1
Number of comparisons per family	3
Alpha	0.05
Tukey's multiple comparisons test	Mean Diff.	95.00% CI of diff.	Significant?	Summary	Adjusted P Value
WT vs. MMP14KO	2.317	-26.44 to 31.07	No	ns	0.9796	A-B
WT vs. MMP14OE	34.47	4.339 to 64.60	Yes	*	0.0211	A-C
MMP14KO vs. MMP14OE	32.15	2.316 to 61.99	Yes	*	0.0318	B-C
Test details	Mean 1	Mean 2	Mean Diff.	SE of diff.	n1	n2	q	DF
WT vs. MMP14KO	110.6	108.3	2.317	11.98	23	24	0.2734	64
WT vs. MMP14OE	110.6	76.15	34.47	12.56	23	20	3.882	64
MMP14KO vs. MMP14OE	108.3	76.15	32.15	12.44	24	20	3.657	64

## Sheet: Fig3d Organotypic tapering
MMP14 KO	WT	MMP14 OE
0.736595	1.14223	2.05724
1.8339	0.723141	6.69319
1.22735	1.32025	2.0981
1.15053	1.12287	2.39176
1.50003	1.34647	2.65864
1.19607	1.27368	2.92431
1.7251	1.57815	1.61847
1.15573	1.2761	3.71303
1.58542	1.06714	1.55291
1.15703	3.0178	1.56585
0.899207	1.30573	1.79024
2.0918	1.49069	2.5422
1.06048	1.89189	3.11353
1.38057	1.4679	3.16222
1.04248	2.09823	2.36671
0.823232	1.61062	2.6763
1.37023	1.64394	3.74909
1.33755	1.38482	2.63305
1.16667	1.24853	1.85018
0.869231	2.59458	2.14162
1.09517	2.08493	1.88814
1.38777	1.38674	2.57256
1.06475	1.18077	1.18503
		2.59629
		2.93388
		3.37381
		2.08534
		2.19948
		2.2409
Bartlett's test
Bartlett's statistic (corrected)	28.94
P value	<0.0001
P value summary	****
Are SDs significantly different (P < 0.05)?	Yes
ANOVA table	SS	DF	MS	F (DFn, DFd)	P value
Treatment (between columns)	25.27	2	12.64	F (2, 72) = 24.48	P<0.0001
Residual (within columns)	37.17	72	0.5162
Total	62.44	74
Data summary
Number of treatments (columns)	3
Number of values (total)	75
Number of families	1
Number of comparisons per family	3
Alpha	0.05
Tukey's multiple comparisons test	Mean Diff.	95.00% CI of diff.	Significant?	Summary	Adjusted P Value
MMP14 KO vs. WT	-0.2783	-0.7853 to 0.2287	No	ns	0.3924	A-B
MMP14 KO vs. MMP14 OE	-1.31	-1.790 to -0.8299	Yes	****	<0.0001	A-C
WT vs. MMP14 OE	-1.032	-1.512 to -0.5516	Yes	****	<0.0001	B-C
Test details	Mean 1	Mean 2	Mean Diff.	SE of diff.	n1	n2	q	DF
MMP14 KO vs. WT	1.255	1.533	-0.2783	0.2119	23	23	1.857	72
MMP14 KO vs. MMP14 OE	1.255	2.565	-1.31	0.2006	23	29	9.235	72
WT vs. MMP14 OE	1.533	2.565	-1.032	0.2006	23	29	7.273	72

## Sheet: Fig3d Organotypic width
WT	MMP14KO	MMP14OE
47.2316	22	139.447
69.121	22.9524	77.5607
42.5135	18.915	141.865
40.4329	16.0103	74.4054
61.1801	21.8409	117.593
37.2655	26.1154	78.1587
44.5812	18.7406	80.1139
37.3971	25.1415	97.0662
45.8402	15.3687	94.413
30.9174	19.9551	138.651
20.9884	35.0887	127.007
53.7399	27.6294	181.857
38.743	15.912	96.5662
22.9106	15.4106	69.8194
42.7599	17.4744	144.193
38.5385	42.4324	82.2179
31.259	18.2697	85.3946
32.1481	15.1306	151.49
48.7424	41.7549	124.549
30.8193	20.9752	100.084
35.0972	29.7726	79.3517
	18.3709	118.352
	17.6981	126.682
	14.8081	131.79
		138.27
		106.435
		169.29
		104.028
		149.344
Table Analyzed	Data 1
Data sets analyzed	A-C
ANOVA summary
F	149
P value	<0.0001
P value summary	****
Significant diff. among means (P < 0.05)?	Yes
R square	0.8076
Brown-Forsythe test
F (DFn	DFd)	26.31 (2	71)
P value	<0.0001
P value summary	****
Are SDs significantly different (P < 0.05)?	Yes
Bartlett's test
Bartlett's statistic (corrected)	44.54
P value	<0.0001
P value summary	****
Are SDs significantly different (P < 0.05)?	Yes
ANOVA table	SS	DF	MS	F (DFn	DFd)	P value
Treatment (between columns)	127544	2	63772	F (2	71) = 149.0	P<0.0001
Residual (within columns)	30380	71	427.9
Total	157924	73
Data summary
Number of treatments (columns)	3
Number of values (total)	74
Number of families	1
Number of comparisons per family	3
Alpha	0.05
Tukey's multiple comparisons test	Mean Diff.	95.00% CI of diff.	Significant?	Summary	Adjusted P Value
WT vs. MMP14KO	18.18	3.379 to 32.97	Yes	*	0.0121	A-B
WT vs. MMP14OE	-74.11	-88.30 to -59.92	Yes	****	<0.0001	A-C
MMP14KO vs. MMP14OE	-92.28	-105.9 to -78.62	Yes	****	<0.0001	B-C
Test details	Mean 1	Mean 2	Mean Diff.	SE of diff.	n1	n2	q	DF
WT vs. MMP14KO	40.58	22.41	18.18	6.181	21	24	4.158	71
WT vs. MMP14OE	40.58	114.7	-74.11	5.927	21	29	17.68	71
MMP14KO vs. MMP14OE	22.41	114.7	-92.28	5.708	24	29	22.86	71

## Sheet: Fig3d Organotypic length
WT	MMP14KO	MMP14OE
625.175	204.359	299.444
371.041	441.821	475.309
445.422	177.295	147.003
558.959	90.911	110.725
484.962	57.172	181.074
338.686	308.846	488.984
629.038	138.953	553.446
203.615	127.063	334.015
218.94	409.456	137.322
217.424	227.844	223.769
344.486	195.912	138.452
295.427	335.492	592.45
357.438	242.459	135.418
415.116	236.509	143.753
303.806	167.92	316.695
220.436	391.604	178.559
750.981	272.118	184.817
731.057	282.647	429.841
696.795	190.094	223.694
404.354	252.575	226.662
423.216		471.335
		104.019
		361.612
		123.117
		251.455
		282.62
		154.829
		245.279
		290.325
Table Analyzed	Data 1
Data sets analyzed	A-C
ANOVA summary
F	11.19
P value	<0.0001
P value summary	****
Significant diff. among means (P < 0.05)?	Yes
R square	0.2504
Brown-Forsythe test
F (DFn	DFd)	2.062 (2	67)
P value	0.1352
P value summary	ns
Are SDs significantly different (P < 0.05)?	No
Bartlett's test
Bartlett's statistic (corrected)	4.958
P value	0.0838
P value summary	ns
Are SDs significantly different (P < 0.05)?	No
ANOVA table	SS	DF	MS	F (DFn	DFd)	P value
Treatment (between columns)	457080	2	228540	F (2	67) = 11.19	P<0.0001
Residual (within columns)	1368571	67	20426
Total	1825652	69
Data summary
Number of treatments (columns)	3
Number of values (total)	70
Number of families	1
Number of comparisons per family	3
Alpha	0.05
Tukey's multiple comparisons test	Mean Diff.	95.00% CI of diff.	Significant?	Summary	Adjusted P Value
WT vs. MMP14KO	192.8	85.72 to 299.8	Yes	***	0.0002	A-B
WT vs. MMP14OE	161.1	62.97 to 259.3	Yes	***	0.0006	A-C
MMP14KO vs. MMP14OE	-31.62	-131.2 to 67.95	No	ns	0.7279	B-C
Test details	Mean 1	Mean 2	Mean Diff.	SE of diff.	n1	n2	q	DF
WT vs. MMP14KO	430.3	237.6	192.8	44.65	21	20	6.104	67
WT vs. MMP14OE	430.3	269.2	161.1	40.95	21	29	5.564	67
MMP14KO vs. MMP14OE	237.6	269.2	-31.62	41.54	20	29	1.076	67
