# Supplementary material for: Interplay of adherens junctions and matrix proteolysis determines the invasive pattern and growth of squamous cell carcinoma
Source: eLife. 2023 Mar 9;12:e76520. doi: 10.7554/eLife.76520 (PMC9998089; doi:10.7554/eLife.76520)
Supplement: Figure 4—figure supplement 1—source data 1. [file elife-76520-fig4-figsupp1-data1.xlsx]

## Sheet: Figure 4 - figure supplement 1c
WT	ITGB1 KO
138	18
119	13
144	23
121	24
113	19
114	13
95	21
127	15
117	17
Table Analyzed	Data 1
Column B	ITGB1 KO
vs.	vs.
Column A	WT
Unpaired t test
P value	<0.0001
P value summary	****
Significantly different (P < 0.05)?	Yes
One- or two-tailed P value?	Two-tailed
t, df	t=20.59, df=16
How big is the difference?
Mean of column A	120.9
Mean of column B	18.11
Difference between means (B - A) ± SEM	-102.8 ± 4.991
95% confidence interval	-113.4 to -92.20
R squared (eta squared)	0.9636
F test to compare variances
F, DFn, Dfd	12.70, 8, 8
P value	0.0017
P value summary	**
Significantly different (P < 0.05)?	Yes
Data analyzed
Sample size, column A	9
Sample size, column B	9
