# Supplementary material for: Interplay of adherens junctions and matrix proteolysis determines the invasive pattern and growth of squamous cell carcinoma
Source: eLife. 2023 Mar 9;12:e76520. doi: 10.7554/eLife.76520 (PMC9998089; doi:10.7554/eLife.76520)
Supplement: Figure 4—source data 1. [file elife-76520-fig4-data1.xlsx]

## Sheet: Fig4d Spheroid tapering
WT	ITGB1KO
1.29487	2.30109
1.23408	3.3224
1.38678	2.47648
1.90633	2.61857
1.2286	1.79235
1.15078	2.44657
1.63124	1.94537
1.3905	1.82759
1.0244	1.66707
2.03451	1.62207
1.51821	2.44396
1.57763	2.3087
3.84123	2.92321
2.09844	1.76818
1.28691	1.94133
1.65678	1.65111
1.69197	1.72738
1.31996	3.56324
3.03043	2.47541
	2.31623
	3.69513
	3.2505
	2.47801
	2.08887
	1.03015
	1.27139
	0.913201
	1.39101
	2.28197
	1.49905
Table Analyzed	Spheroid tapering
Column B	ITGB1KO
vs.	vs.
Column A	WT
Unpaired t test
P value	0.0269
P value summary	*
Significantly different (P < 0.05)?	Yes
One- or two-tailed P value?	Two-tailed
t	df	t=2.284	df=47
How big is the difference?
Mean of column A	1.7
Mean of column B	2.168
Difference between means (B - A) ± SEM	0.4677 ± 0.2048
95% confidence interval	0.05582 to 0.8796
R squared (eta squared)	0.09993
F test to compare variances
F	DFn	Dfd	1.035	29	18
P value	0.963
P value summary	ns
Significantly different (P < 0.05)?	No
Data analyzed
Sample size	column A	19
Sample size	column B	30

## Sheet: Fig4d Spheroid length
WT	ITGB1 KO
221.255	203.23
135.017	77.028
243.007	93.83
130.039	194.99
132.903	165.825
106.668	85.378
160.412	76.625
247.456	197.635
122.108	130.511
98.162	101.143
181.848	213.902
137.018	172.118
234.649	138.543
45.277	190.987
84.608	163.991
102.044	161.879
149.879	142.459
138.044	153.14
116.765	154.32
83.308	75.426
155.276	96.786
137.107	174.77
64.195	120.876
Table Analyzed	Spheroid length
Column B	ITGB1 KO
vs.	vs.
Column A	WT
Unpaired t test
P value	0.8643
P value summary	ns
Significantly different (P < 0.05)?	No
One- or two-tailed P value?	Two-tailed
t	df	t=0.1719	df=44
How big is the difference?
Mean of column A	140.3
Mean of column B	142.8
Difference between means (B - A) ± SEM	2.537 ± 14.76
95% confidence interval	-27.21 to 32.28
R squared (eta squared)	0.0006709
F test to compare variances
F	DFn	Dfd	1.525	22	22
P value	0.3299
P value summary	ns
Significantly different (P < 0.05)?	No
Data analyzed
Sample size	column A	23
Sample size	column B	23

## Sheet: Fig 4d Spheroid width
WT	ITGB1 KO
47.508	31.575
22	15.232
31.321	44.643
15.811	42.426
29.833	26.833
31.385	36.056
31.78	22.361
20.616	20.616
33.242	14.422
22.091	22.361
24.187	21.84
26.249	46
36.235	72.835
16.553	28.425
41.049	40.112
21	40
18.385	45.607
49.244	31.016
34.132	17.088
41.195	36.346
53.824	39.205
32.016	21.633
46.615	22.361
25.02	31.385
Table Analyzed	Strand width WT vs ITGB1KO Sph
Column B	ITGB1 KO
vs.	vs.
Column A	WT
Unpaired t test
P value	0.8204
P value summary	ns
Significantly different (P < 0.05)?	No
One- or two-tailed P value?	Two-tailed
t, df	t=0.2283, df=46
How big is the difference?
Mean of column A	31.3
Mean of column B	32.1
Difference between means (B - A) ± SEM	0.7953 ± 3.483
95% confidence interval	-6.216 to 7.806
R squared (eta squared)	0.001132
F test to compare variances
F, DFn, Dfd	1.490, 23, 23
P value	0.3462
P value summary	ns
Significantly different (P < 0.05)?	No
Data analyzed
Sample size, column A	24
Sample size, column B	24

## Sheet: Fig4d Organptypic tapering
WT	ITGB1KO
0.852078	1.33232
1.12135	1.00462
1.55499	1.39859
1.53532	1.18588
2.0651	1.42802
1.42902	1.4753
2.32725	1.20423
3.74566	3.27138
0.92378	1.41858
2.08299	2.18353
2.84821	1.77937
1.65466	2.07525
2.26183	1.37109
1.51007	0.794024
1.31685	1.7445
1.57942	1.36066
1.74558	1.26491
1.73333	1.96442
1.80568	1.5672
1.38385	1.09564
1.34791	1.46355
1.2823	0.983856
1.80428	2.11215
	0.774021
	1.61243
	1.29719
Table Analyzed	Organptypic tapering
Column B	ITGB1KO
vs.	vs.
Column A	WT
Unpaired t test
P value	0.1717
P value summary	ns
Significantly different (P < 0.05)?	No
One- or two-tailed P value?	Two-tailed
t	df	t=1.388	df=47
How big is the difference?
Mean of column A	1.735
Mean of column B	1.506
Difference between means (B - A) ± SEM	-0.2290 ± 0.1650
95% confidence interval	-0.5610 to 0.1029
R squared (eta squared)	0.03938
F test to compare variances
F	DFn	Dfd	1.492	22	25
P value	0.3334
P value summary	ns
Significantly different (P < 0.05)?	No
Data analyzed
Sample size	column A	23
Sample size	column B	26

## Sheet: Fig 4d Organotypic width
WT	ITGB1 KO
39.294	33.838
29	22.091
27.019	31.241
24.187	42.19
45.31	27.659
27.893	36.069
54.424	28.46
55.218	32.249
45.255	23.409
32.65	29.547
42.72	33.015
49.497	29.53
58.181	52.431
48.26	28.178
32.311	30.15
46.228	27.203
25.942	33.061
40.311	26.173
51.078	42.45
51.478	31.385
47.802	25.942
60.033	26.173
48.826	47
44	35.057
58.694	29.732
	37.643
	28.653
Table Analyzed	Strand width WT vs ITGB1KO Org
Column B	ITGB1 KO
vs.	vs.
Column A	WT
Unpaired t test
P value	<0.0001
P value summary	****
Significantly different (P < 0.05)?	Yes
One- or two-tailed P value?	Two-tailed
t, df	t=4.401, df=50
How big is the difference?
Mean of column A	43.42
Mean of column B	32.24
Difference between means (B - A) ± SEM	-11.18 ± 2.541
95% confidence interval	-16.29 to -6.079
R squared (eta squared)	0.2792
F test to compare variances
F, DFn, Dfd	2.421, 24, 26
P value	0.03
P value summary	*
Significantly different (P < 0.05)?	Yes
Data analyzed
Sample size, column A	25
Sample size, column B	27

## Sheet: Fig4d Organotypic length
WT	ITGB1 KO
376.412	519.032
400.119	748.127
471.524	454.3
686.109	1196.3
210.932	350.105
519.429	442.322
313.766	411.149
476.691	473.035
304.436	359.279
383.435	444.83
312.786	249.863
371.181	545.2
436.176	140.809
620.045	431.397
602.247	401.953
375.636	502.678
667.089	422.101
522.76	367.045
263.523	395.914
464.813	614.73
312.8	403.855
479.586	682.034
409.808	211.821
309.533	287.891
	662.544
	491.706
Table Analyzed	Organotypic length
Column B	ITGB1 KO
vs.	vs.
Column A	WT
Unpaired t test
P value	0.4036
P value summary	ns
Significantly different (P < 0.05)?	No
One- or two-tailed P value?	Two-tailed
t	df	t=0.8427	df=48
How big is the difference?
Mean of column A	428.8
Mean of column B	469.6
Difference between means (B - A) ± SEM	40.83 ± 48.45
95% confidence interval	-56.58 to 138.2
R squared (eta squared)	0.01458
F test to compare variances
F	DFn	Dfd	2.562	25	23
P value	0.0264
P value summary	*
Significantly different (P < 0.05)?	Yes
Data analyzed
Sample size	column A	24
Sample size	column B	26
