# Supplementary material for: Interplay of adherens junctions and matrix proteolysis determines the invasive pattern and growth of squamous cell carcinoma
Source: eLife. 2023 Mar 9;12:e76520. doi: 10.7554/eLife.76520 (PMC9998089; doi:10.7554/eLife.76520)
Supplement: Figure 6—figure supplement 1—source data 1. [file elife-76520-fig6-figsupp1-data1.xlsx]

## Sheet: Figure 6 - figure supplement 1a
WT		CTNNA1 KO		WT		Y27632		ROCK:ER no 4OHT		ROCK:ER plus 4OHT
Edge	Junc	Edge	Junc	Edge	Junc	Edge	Junc	Edge	Junc	Edge	Junc
1.49441	0.646882	0.623384	0.901942	1.04492	0.55285	0.560942	0.535974	0.949696	1.21188	2.06371	1.06402
1.65101	0.46319	0.811396	0.75699	0.945203	0.506971	0.479826	0.494518	1.16975	0.460557	0.52422	1.9415
2.2323	0.644917	0.761389	1.37439	1.2566	0.418177	0.397143	0.516999	1.54641	0.852176	0.574915	1.36408
1.2395	0.554567	0.513613	0.968969	1.43552	0.444282	0.329089	0.391846	1.21021	0.372744	1.18595	1.67322
0.922317	0.644944	0.393665	1.11569	2.37516	0.524013	0.530724	0.402205	1.41776	0.488087	1.92721	1.25998
1.00803	0.520061	0.705054	0.465306	0.964782	0.717106	0.428276	0.386443	1.86602	0.399652	1.31194	0.736587
1.23278	0.644135	0.827005	0.598155	2.28496	0.791231	0.498732	0.473684	1.48327	0.731377	1.05544	3.95234
0.940525	0.841249	0.74316	0.997212	0.882759	0.828667	0.294038	0.357926	1.30182	0.569962	2.46934	5.63908
1.1689	0.541116	0.48364	1.05295	1.19757	0.822478	0.187496	0.219887	0.842019	1.11838	1.67951	2.36117
1.57053	0.397595	0.538083	1.41276	1.77794	0.588647	0.243393	0.207962	1.55903	0.709467	0.86374	1.69595
2.28806	0.880861	0.590548	0.736417	1.75348	0.429955	0.308531	0.245017	1.35126	0.761565	1.87182	1.55654
0.993191	0.800764	0.424385	1.75099	1.83104	0.578839	0.129128	0.256567	1.34675	0.758735	2.12332	2.80992
0.566515	0.635432	0.384045	0.631808	0.989791	0.518861	0.251888	0.27698	1.29443	0.600475	0.754336	1.89451
1.39949	0.369896	0.510638	0.762435	1.00969	0.475438	0.231243	0.195831	1.65192	0.445954	1.59166	2.41087
1.92984	0.523118	1.12429	1.30789	1.36253	0.669854	0.388348	0.492035	1.16769	0.482679	0.701207	0.951482
1.4697	0.710794	0.407358	1.10622	1.4428	0.544902	0.475811	0.439381	1.5608	0.665458	0.934248	0.756751
1.65486	0.55608	0.969537	1.36899	1.31973	0.7079	0.348968	0.59292	1.23777	0.407157	1.11416	0.939627
1.25405	0.591556	0.937749	1.12789	0.869764	0.60944	0.399558	0.35531	1.27706	0.396707	2.36707	1.05829
1.79862	0.568658	0.654799	1.06187	1.41519	0.483481	0.463274	0.480973	1.57717	0.393743
1.1061	0.59949	0.41125	1.45956	1.20501	0.507522	0.470206	0.468879	1.65609	0.394072
1.79296	0.561686	0.444419	0.928343	2.1705	0.558407	0.488938	0.469912	1.81658	0.492316
1.30939	0.505029	0.807762	2.10549	1.2382	0.529794	0.427729	0.376696
0.856424	0.585029	0.560814	0.766657	1.89085	0.724336
1.52625	0.600378	1.8557	0.59686	1.26239	0.533923
1.00177	0.448256
1.8657	0.733401
1.47177	0.732733
WT vs CTNNA1 KO											Non treated vs Y27632 treated										ROCK:ER with/without 4OHT
Table Analyzed	WT vs CTNNA1KO										Table Analyzed	WT vs Y27632									Table Analyzed	ROCKER with/without 4OHT
Data sets analyzed	A-D										Data sets analyzed	A-D									Data sets analyzed	A-D
ANOVA summary											ANOVA summary										ANOVA summary
F	31.71										F	90.26									F	11.66
P value	<0.0001										P value	<0.0001									P value	<0.0001
P value summary	****										P value summary	****									P value summary	****
Significant diff. among means (P < 0.05)?	Yes										Significant diff. among means (P < 0.05)?	Yes									Significant diff. among means (P < 0.05)?	Yes
R square	0.4925										R square	0.7547									R square	0.321
Brown-Forsythe test											Brown-Forsythe test										Brown-Forsythe test
F (DFn, DFd)	6.760 (3, 98)										F (DFn, DFd)	12.76 (3, 88)									F (DFn, DFd)	6.889 (3, 74)
P value	0.0003										P value	<0.0001									P value	0.0004
P value summary	***										P value summary	****									P value summary	***
Are SDs significantly different (P < 0.05)?	Yes										Are SDs significantly different (P < 0.05)?	Yes									Are SDs significantly different (P < 0.05)?	Yes
Bartlett's test											Bartlett's test										Bartlett's test
Bartlett's statistic (corrected)	33.07										Bartlett's statistic (corrected)	68.5									Bartlett's statistic (corrected)	63.87
P value	<0.0001										P value	<0.0001									P value	<0.0001
P value summary	****										P value summary	****									P value summary	****
Are SDs significantly different (P < 0.05)?	Yes										Are SDs significantly different (P < 0.05)?	Yes									Are SDs significantly different (P < 0.05)?	Yes
ANOVA table	SS	DF	MS	F (DFn, DFd)	P value						ANOVA table	SS	DF	MS	F (DFn, DFd)	P value					ANOVA table	SS	DF	MS	F (DFn, DFd)	P value
Treatment (between columns)	10.58	3	3.526	F (3, 98) = 31.71	P<0.0001						Treatment (between columns)	16.88	3	5.626	F (3, 88) = 90.26	P<0.0001					Treatment (between columns)	16.8	3	5.601	F (3, 74) = 11.66	P<0.0001
Residual (within columns)	10.9	98	0.1112								Residual (within columns)	5.485	88	0.06233							Residual (within columns)	35.54	74	0.4803
Total	21.48	101									Total	22.36	91								Total	52.35	77
Data summary											Data summary										Data summary
Number of treatments (columns)	4										Number of treatments (columns)	4									Number of treatments (columns)	4
Number of values (total)	102										Number of values (total)	92									Number of values (total)	78
Number of families	1										Number of families	1									Number of families	1
Number of comparisons per family	6										Number of comparisons per family	6									Number of comparisons per family	6
Alpha	0.05										Alpha	0.05									Alpha	0.05
Tukey's multiple comparisons test	Mean Diff.	95.00% CI of diff.	Significant?	Summary	Adjusted P Value						Tukey's multiple comparisons test	Mean Diff.	95.00% CI of diff.	Significant?	Summary	Adjusted P Value					Tukey's multiple comparisons test	Mean Diff.	95.00% CI of diff.	Significant?	Summary	Adjusted P Value
WT Edge vs. WT Junc	0.7942	0.5570 to 1.031	Yes	****	<0.0001	A-B					NT Edge vs. NT Junc	0.8275	0.6387 to 1.016	Yes	****	<0.0001	A-B				4OHT- Edge vs. 4OHT- Junc	0.7891	0.2269 to 1.351	Yes	**	0.0024	A-B
WT Edge vs. CTNNA1KO Edge	0.7111	0.4666 to 0.9557	Yes	****	<0.0001	A-C					NT Edge vs. Y27632 Edge	1.035	0.8418 to 1.228	Yes	****	<0.0001	A-C				4OHT- Edge vs. 4OHT+ Edge	-0.000759	-0.5859 to 0.5844	No	ns	>0.9999	A-C
WT Edge vs. CTNNA1KO Junc	0.3415	0.09694 to 0.5860	Yes	**	0.0024	A-D					NT Edge vs. Y27632 Junc	1.021	0.8280 to 1.214	Yes	****	<0.0001	A-D				4OHT- Edge vs. 4OHT+ Junc	-0.4981	-1.083 to 0.08702	No	ns	0.1227	A-D
WT Junc vs. CTNNA1KO Edge	-0.08305	-0.3276 to 0.1615	No	ns	0.8113	B-C					NT Junc vs. Y27632 Edge	0.2073	0.01436 to 0.4003	Yes	*	0.0302	B-C				4OHT- Junc vs. 4OHT+ Edge	-0.7898	-1.375 to -0.2047	Yes	**	0.0037	B-C
WT Junc vs. CTNNA1KO Junc	-0.4527	-0.6973 to -0.2082	Yes	****	<0.0001	B-D					NT Junc vs. Y27632 Junc	0.1935	0.0005161 to 0.3865	Yes	*	0.0491	B-D				4OHT- Junc vs. 4OHT+ Junc	-1.287	-1.872 to -0.7020	Yes	****	<0.0001	B-D
CTNNA1KO Edge vs. CTNNA1KO Junc	-0.3697	-0.6213 to -0.1180	Yes	**	0.0012	C-D					Y27632 Edge vs. Y27632 Junc	-0.01385	-0.2110 to 0.1833	No	ns	0.9978	C-D				4OHT+ Edge vs. 4OHT+ Junc	-0.4973	-1.105 to 0.1099	No	ns	0.1463	C-D
Test details	Mean 1	Mean 2	Mean Diff.	SE of diff.	n1	n2	q	DF			Test details	Mean 1	Mean 2	Mean Diff.	SE of diff.	n1	n2	q	DF		Test details	Mean 1	Mean 2	Mean Diff.	SE of diff.	n1	n2	q	DF
WT Edge vs. WT Junc	1.398	0.6038	0.7942	0.09077	27	27	12.37	98			NT Edge vs. NT Junc	1.414	0.5861	0.8275	0.07207	24	24	16.24	88		4OHT- Edge vs. 4OHT- Junc	1.394	0.6054	0.7891	0.2139	21	21	5.217	74
WT Edge vs. CTNNA1KO Edge	1.398	0.6868	0.7111	0.09356	27	24	10.75	98			NT Edge vs. Y27632 Edge	1.414	0.3788	1.035	0.07369	24	22	19.86	88		4OHT- Edge vs. 4OHT+ Edge	1.394	1.395	-0.000759	0.2226	21	18	0.004822	74
WT Edge vs. CTNNA1KO Junc	1.398	1.056	0.3415	0.09356	27	24	5.162	98			NT Edge vs. Y27632 Junc	1.414	0.3926	1.021	0.07369	24	22	19.59	88		4OHT- Edge vs. 4OHT+ Junc	1.394	1.893	-0.4981	0.2226	21	18	3.164	74
WT Junc vs. CTNNA1KO Edge	0.6038	0.6868	-0.08305	0.09356	27	24	1.255	98			NT Junc vs. Y27632 Edge	0.5861	0.3788	0.2073	0.07369	24	22	3.979	88		4OHT- Junc vs. 4OHT+ Edge	0.6054	1.395	-0.7898	0.2226	21	18	5.017	74
WT Junc vs. CTNNA1KO Junc	0.6038	1.056	-0.4527	0.09356	27	24	6.843	98			NT Junc vs. Y27632 Junc	0.5861	0.3926	0.1935	0.07369	24	22	3.713	88		4OHT- Junc vs. 4OHT+ Junc	0.6054	1.893	-1.287	0.2226	21	18	8.177	74
CTNNA1KO Edge vs. CTNNA1KO Junc	0.6868	1.056	-0.3697	0.09627	24	24	5.43	98			Y27632 Edge vs. Y27632 Junc	0.3788	0.3926	-0.01385	0.07527	22	22	0.2602	88		4OHT+ Edge vs. 4OHT+ Junc	1.395	1.893	-0.4973	0.231	18	18	3.045	74
