# Supplementary material for: Interplay of adherens junctions and matrix proteolysis determines the invasive pattern and growth of squamous cell carcinoma
Source: eLife. 2023 Mar 9;12:e76520. doi: 10.7554/eLife.76520 (PMC9998089; doi:10.7554/eLife.76520)
Supplement: Figure 6—source data 1. [file elife-76520-fig6-data1.xlsx]

## Sheet: Fig.6d
WT	MMP14OE	MMP14OE+ Y27632
58.723	110.808	81.1887
45.1005	204.233	84.5607
36.4633	166.483	35.3572
43.435	188.611	27.32
46.7009	127.438	48.075
38.7537	127.694	48.037
48.1486	246.176	85.261
35.6948	88.8019	76.4627
72.2933	51.4081	61.2417
42.9416	175.795	100.221
87.3315	84.453	62.8388
86.8429	166.593	30.2207
41.1923	195.804	66.8883
49.2946	174.135	51.1828
35.5101	141.29	70.0708
37.4084	195.765	102.295
34.3565	82.3299	66.3157
14.0058	77.8048	65.3063
26.7624	112.82	46.2524
34.583	125.775	36.8436
29.5539	189.154	27.9398
36.3616	127.296	65.8398
60.7454	170.814	100.257
27.7389	149.343	67.6224
46.2863	180.062	63.0863
		127.854
		115.142
		110.666
		157.942
Number of families	1
Number of comparisons per family	3
Alpha	0.05
Tukey's multiple comparisons test	Mean Diff.	95.00% CI of diff.	Significant?	Summary	Adjusted P Value
WT vs. MMP14OE	-101.8	-125.0 to -78.53	Yes	****	<0.0001	A-B
WT vs. Column C	-27.15	-49.59 to -4.718	Yes	*	0.0136	A-C
MMP14OE vs. Column C	74.63	52.20 to 97.07	Yes	****	<0.0001	B-C
Test details	Mean 1	Mean 2	Mean Diff.	SE of diff.	n1	n2	q	DF
WT vs. MMP14OE	44.65	146.4	-101.8	9.727	25	25	14.8	76
WT vs. Column C	44.65	71.8	-27.15	9.386	25	29	4.091	76
MMP14OE vs. Column C	146.4	71.8	74.63	9.386	25	29	11.25	76

## Sheet: Fig.6e
4OHT -	4OHT +
207.021	48.3376
116.815	60.2424
60.1776	114.863
85.8943	25.3917
158.79	51.7192
125.777	85.3278
171.551	50.852
65.1622	43.2209
69.7823	32.0412
186.315	91.2465
90.4892	58.3085
136.72	60.849
133.459	85.5372
	76.8541
	93.3682
	37.4363
	77.31
	65.3874
	62.6178
	62.9843
Table Analyzed	Data 1
Column B	4OHT +
vs.	vs.
Column A	4OHT -
Unpaired t test
P value	<0.0001
P value summary	****
Significantly different (P < 0.05)?	Yes
One- or two-tailed P value?	Two-tailed
t	df	t=4.812	df=31
How big is the difference?
Mean of column A	123.7
Mean of column B	64.19
Difference between means (B - A) ± SEM	-59.49 ± 12.36
95% confidence interval	-84.71 to -34.28
R squared (eta squared)	0.4276
F test to compare variances
F	DFn	Dfd	4.491	12	19
P value	0.0037
P value summary	**
Significantly different (P < 0.05)?	Yes
Data analyzed
Sample size	column A	13
Sample size	column B	20
