# Supplementary material for: Interplay of adherens junctions and matrix proteolysis determines the invasive pattern and growth of squamous cell carcinoma
Source: eLife. 2023 Mar 9;12:e76520. doi: 10.7554/eLife.76520 (PMC9998089; doi:10.7554/eLife.76520)
Supplement: Figure 7—source data 1. [file elife-76520-fig7-data1.xlsx]

## Sheet: Fig7C length
WT	MMP14KO	MMP14OE	aCATKO	aCATKO MMP14KO	aCATKO MMP14OE
608.757	518.507	319.683	109.953	235.408	132.85
474.643	237.548	197.914	228.376	575.819	216.344
449.532	197.274	198.967	90.641	323.766	491.648
440.87	346.247	265.94	173.689	228.223	461.86
415.957	207.002	353.629	54.231	174.85	468.168
223.477	224.011	235.239	335.961	231.985	116.456
581.945	241.041	126.315	346.799	259.736	219.186
609.997	275.623	458.307	56	180.768	226.139
867.915	295.906	298.104	86.377	194.881	440.968
342.07	369.233	142.284	79.756	86.585	212.932
384.037	325.44	364.338	177.789	132.004	336.848
470.609	276.161	101.213	122.772	294.618	348.213
345.025	132.85	164.937	50.596	295.601	95.441
260.66	295.048	261.85	72.111	475.613	295.657
332.625	140.118	154.402	166.82	56.423	191.604
474.233	273.348	188.59	136.821	96.664	137.251
314.088	125.865	205.696	117.047	329.145	252.986
309.507	143.828	149.482	118.068	338.312	210.758
592.461	180.904	212.013	132.752	68.884	319.265
411.625	149.083	151.447	229.266	101.242	384.54
367.351	129.872	74.33	170	322.841	368.978
373.078	108.143	191.048	409.248	196.787	250.536
264.555	93.744	110.018	249.631	175.736	311.613
222.511	198.553	244.752	138.852	100.102	97.342
224.879	108.622	330.552	215.407	190.957	244.021
283.747	106.026	244.994	477.173	172.754	288.817
137.525	105.19	367.522	196.384	248.165	132.667
221.696	112.098	287.34	190.531	86.977	258.963
472.425	68.242	369.17	311.497	102.417	121.396
122.442	96.385	120.208	113.701	212.72	414.295
335.739	143.967	328.138	397.212	271.631	311.581
460.016	133.85	232.326	160.554	294.442	249.555
335.295	82.558	255.61	113.53	184.048	144
213.542	109.242	350.49	361.224	55.444	151.392
412.751	218.614	97.021	240.04	160.162	67.882
452.185	220.164	168		119.738	143.159
222.656	165.585	157.525		143.648	126
542.007	291.05	141.667		199.621	124.247
179.626	264.538	203.607		289.171	250.098
312.602	322.76	378.306		264.196	214.631
468.895	231.55	268.534		173.292	277.296
284.538	141.892	229.47		111.408	358.327
230.293	236.417	306.879		106.212	157.892
293.989		525.775		243.347	224.97
221.244		186.953		111.485	165.966
252.933		353.094		159.411	242.475
541.947		307.125		208.764	319.681
194.969		450.013		45.967	269.275
447.33		315.295		80.604	145.413
227.911		293.294		177.505	566
123.972		143.684		130.969	247.51
517.975		389.085		428.924	312.141
366.756		250.535		169.361	278.173
570.468		435.602		355.366	343.384
337.007		374.958		175.295	248.398
259.059		263.388			163.012
264.903		217.963			228.676
265.222		191.186			457.016
95.341		243.434			436.322
204.949		234.133			262.119
275.485		329.147			217.324
304.91		195.711			117.351
267.44		304.078			316.008
		332.377			88.468
		348.298			332.48
		344.021			117.712
		528.616			193.817
		263.392			363.696
		194.867			162.212
		606.001			183.412
		356.033			295.179
		239.243			206.481
		202.08			262.636
		562.735			119.105
		208.12			150.194
		459.8			244.047
					470.108
					250.091
					201.195
					342.545
					204.223
					241.805
					135.366
					256.457
					317.748
					405.45
					68.264
					112.78
					296.42
					275.882
					357.303
					404.161
					344.687
Table Analyzed	Data 1
Data sets analyzed	A-F
ANOVA summary
F	15.33
P value	<0.0001
P value summary	****
Significant diff. among means (P < 0.05)?	Yes
R square	0.1759
Brown-Forsythe test
F (DFn	DFd)	1.949 (5	359)
P value	0.0856
P value summary	ns
Are SDs significantly different (P < 0.05)?	No
Bartlett's test
Bartlett's statistic (corrected)	11.95
P value	0.0354
P value summary	*
Are SDs significantly different (P < 0.05)?	Yes
ANOVA table	SS	DF	MS	F (DFn	DFd)	P value
Treatment (between columns)	1022404	5	204481	F (5	359) = 15.33	P<0.0001
Residual (within columns)	4789408	359	13341
Total	5811812	364
Data summary
Number of treatments (columns)	6
Number of values (total)	365
Number of families	1
Number of comparisons per family	15
Alpha	0.05
Tukey's multiple comparisons test	Mean Diff.	95.00% CI of diff.	Significant?	Summary	Adjusted P Value
WT vs. MMP14KO	149.5	84.05 to 215.0	Yes	****	<0.0001	A-B
WT vs. MMP14OE	78.73	22.34 to 135.1	Yes	**	0.0011	A-C
WT vs. aCATKO	161.1	91.32 to 230.9	Yes	****	<0.0001	A-D
WT vs. Column E	147.8	86.74 to 208.9	Yes	****	<0.0001	A-E
WT vs. Column F	96.9	42.90 to 150.9	Yes	****	<0.0001	A-F
MMP14KO vs. MMP14OE	-70.79	-133.9 to -7.638	Yes	*	0.0179	B-C
MMP14KO vs. aCATKO	11.57	-63.77 to 86.91	No	ns	0.9979	B-D
MMP14KO vs. Column E	-1.702	-69.07 to 65.66	No	ns	>0.9999	B-E
MMP14KO vs. Column F	-52.62	-113.6 to 8.410	No	ns	0.1358	B-F
MMP14OE vs. aCATKO	82.36	14.76 to 150.0	Yes	**	0.0071	C-D
MMP14OE vs. Column E	69.09	10.50 to 127.7	Yes	*	0.0104	C-E
MMP14OE vs. Column F	18.17	-33.00 to 69.34	No	ns	0.912	C-F
aCATKO vs. Column E	-13.28	-84.83 to 58.28	No	ns	0.9949	D-E
aCATKO vs. Column F	-64.19	-129.8 to 1.433	No	ns	0.0593	D-F
Column E vs. Column F	-50.92	-107.2 to 5.376	No	ns	0.102	E-F
Test details	Mean 1	Mean 2	Mean Diff.	SE of diff.	n1	n2	q	DF
WT vs. MMP14KO	350.5	201	149.5	22.85	63	43	9.255	359
WT vs. MMP14OE	350.5	271.8	78.73	19.68	63	76	5.657	359
WT vs. aCATKO	350.5	189.5	161.1	24.35	63	35	9.356	359
WT vs. Column E	350.5	202.7	147.8	21.31	63	55	9.807	359
WT vs. Column F	350.5	253.6	96.9	18.85	63	93	7.271	359
MMP14KO vs. MMP14OE	201	271.8	-70.79	22.04	43	76	4.542	359
MMP14KO vs. aCATKO	201	189.5	11.57	26.29	43	35	0.6225	359
MMP14KO vs. Column E	201	202.7	-1.702	23.51	43	55	0.1023	359
MMP14KO vs. Column F	201	253.6	-52.62	21.3	43	93	3.494	359
MMP14OE vs. aCATKO	271.8	189.5	82.36	23.59	76	35	4.937	359
MMP14OE vs. Column E	271.8	202.7	69.09	20.45	76	55	4.778	359
MMP14OE vs. Column F	271.8	253.6	18.17	17.86	76	93	1.439	359
aCATKO vs. Column E	189.5	202.7	-13.28	24.97	35	55	0.7517	359
aCATKO vs. Column F	189.5	253.6	-64.19	22.9	35	93	3.963	359
Column E vs. Column F	202.7	253.6	-50.92	19.65	55	93	3.665	359

## Sheet: Fig7C width
WT	MMP14KO	MMP14OE	aCATKO	aCATKO MMP14KO	aCATKO MMP14OE
39.6908	32.5561	139.523	28.5056	15.4332	64.613
29.107	14.6811	57.1201	23.0825	21.42	84.1928
47.4613	19.1921	141.737	19.9999	20.6604	51.4958
54.2658	12.2088	148.031	46.5836	16.5567	60.6314
58.4346	47.6552	328.899	41.67	14.3317	61.0791
26.8429	21.3604	147.757	34.2774	20.7039	56.806
42.9141	13.0935	200.497	51.9151	16.3924	86.6406
46.3364	13.1875	135.825	31.8712	16.125	36.2744
41.0071	12.9976	167.524	34.8546	10.8349	109.276
37.2432	17.0921	81.2435	27.4982	12.4464	52.3655
43.3291	27.3316	105.429	14.7288	13.5381	52.4482
27.1343	12.1012	87.5129	44.3468	13.7727	39.6097
60.2447	19.7778	71.6692	11.1645	15.289	108.829
36.6516	22.4895	127.308	13.4581	14.5522	47.1506
63.8764	21.256	66.2983	10.5173	13.0085
37.5566	20.7635	97.2624	20.6565	18.4783
47.2877	22.293		17.055	17.3981
59.7383	19.5512		13.1415	8.75
42.3734	21.9947		22.5556
62.1276	17.2846		30.1182
59.126			28.0239
35.1324
68.8938
33.6316
64.0579
30.3011
57.1026
46.1086
29.3691
47.0833
Table Analyzed	Data 1
Data sets analyzed	A-F
ANOVA summary
F	44.15
P value	<0.0001
P value summary	****
Significant diff. among means (P < 0.05)?	Yes
R square	0.6614
Brown-Forsythe test
F (DFn	DFd)	11.21 (5	113)
P value	<0.0001
P value summary	****
Are SDs significantly different (P < 0.05)?	Yes
Bartlett's test
Bartlett's statistic (corrected)	164.5
P value	<0.0001
P value summary	****
Are SDs significantly different (P < 0.05)?	Yes
ANOVA table	SS	DF	MS	F (DFn	DFd)	P value
Treatment (between columns)	159151	5	31830	F (5	113) = 44.15	P<0.0001
Residual (within columns)	81470	113	721
Total	240621	118
Data summary
Number of treatments (columns)	6
Number of values (total)	119
Number of families	1
Number of comparisons per family	15
Alpha	0.05
Tukey's multiple comparisons test	Mean Diff.	95.00% CI of diff.	Significant?	Summary	Adjusted P Value
WT vs. MMP14KO	25.37	2.899 to 47.84	Yes	*	0.0173	A-B
WT vs. MMP14OE	-85.66	-109.8 to -61.56	Yes	****	<0.0001	A-C
WT vs. aCATKO	18.86	-3.288 to 41.01	No	ns	0.1423	A-D
WT vs. Column E	30.28	7.067 to 53.49	Yes	**	0.0033	A-E
WT vs. Column F	-19.29	-44.48 to 5.910	No	ns	0.2372	A-F
MMP14KO vs. MMP14OE	-111	-137.1 to -84.92	Yes	****	<0.0001	B-C
MMP14KO vs. aCATKO	-6.51	-30.83 to 17.81	No	ns	0.971	B-D
MMP14KO vs. Column E	4.905	-20.39 to 30.20	No	ns	0.9932	B-E
MMP14KO vs. Column F	-44.66	-71.78 to -17.53	Yes	****	<0.0001	B-F
MMP14OE vs. aCATKO	104.5	78.69 to 130.4	Yes	****	<0.0001	C-D
MMP14OE vs. Column E	115.9	89.19 to 142.7	Yes	****	<0.0001	C-E
MMP14OE vs. Column F	66.38	37.89 to 94.87	Yes	****	<0.0001	C-F
aCATKO vs. Column E	11.42	-13.59 to 36.42	No	ns	0.7714	D-E
aCATKO vs. Column F	-38.15	-65.01 to -11.29	Yes	**	0.001	D-F
Column E vs. Column F	-49.56	-77.30 to -21.82	Yes	****	<0.0001	E-F
Test details	Mean 1	Mean 2	Mean Diff.	SE of diff.	n1	n2	q	DF
WT vs. MMP14KO	45.81	20.44	25.37	7.751	30	20	4.629	113
WT vs. MMP14OE	45.81	131.5	-85.66	8.312	30	16	14.57	113
WT vs. aCATKO	45.81	26.95	18.86	7.64	30	21	3.491	113
WT vs. Column E	45.81	15.54	30.28	8.005	30	18	5.348	113
WT vs. Column F	45.81	65.1	-19.29	8.691	30	14	3.138	113
MMP14KO vs. MMP14OE	20.44	131.5	-111	9.006	20	16	17.44	113
MMP14KO vs. aCATKO	20.44	26.95	-6.51	8.389	20	21	1.097	113
MMP14KO vs. Column E	20.44	15.54	4.905	8.724	20	18	0.7952	113
MMP14KO vs. Column F	20.44	65.1	-44.66	9.357	20	14	6.75	113
MMP14OE vs. aCATKO	131.5	26.95	104.5	8.91	16	21	16.59	113
MMP14OE vs. Column E	131.5	15.54	115.9	9.226	16	18	17.77	113
MMP14OE vs. Column F	131.5	65.1	66.38	9.826	16	14	9.553	113
aCATKO vs. Column E	26.95	15.54	11.42	8.625	21	18	1.872	113
aCATKO vs. Column F	26.95	65.1	-38.15	9.264	21	14	5.823	113
Column E vs. Column F	15.54	65.1	-49.56	9.568	18	14	7.325	113

## Sheet: Fig7e length
WT	MMP14KO	MMP14OE	aCATKO	aCATKO-MMP14KO	aCATKO-MMP14OE
74.25	104.843	110.318	244.491	128.777	257.899
98.082	46.325	60.141	190.611	165.254	165.17
165.427	99.024	39.217	105.482	67.676	141.563
45.891	69.971	79.699	80.671	80.948	99.02
126.355	48.105	49.93	205.32	61.4	94.831
77.75	81.345	90.355	47.083	94.763	154.099
201.442	104.769	39.623	36.366	198.702	135.281
57.009	92.347	129.077	73.246	60.638	256.67
43.012	168.59	95.21	64.681	197	131.175
81.856	143.307	83.863	53.759	119.009	182.12
205.962	122.577	52.038	130.029	121.442	99.04
304.421	55.973	59.363	65.445	85.718	49.477
84.675	112.089	64.9	71.674	187.518	67.052
116.558	45.122	52.773	88.882	151.114	239.366
60.166	134.64	39.56	74.54	60.208	152.566
118.983	79.706	126.522	92.48	277.071	135.899
52.612	53.6	39.661	99.713	183.3	174.154
135.326	136.64	43.046	57.927	218.635	76.844
43.012	40.817	116.846	46.083	129.712	203.88
72.498	58.249	69.539	91.824	100.319	143.707
157.549	39.051	58.036	132.477	76.158	117.91
129.196	46.487	49.659	72.715	55.317	158.97
181.495	69.541	40	70.939	120.577	124.347
128.141	206.31	37.121	161.115	84.214	214.519
108.683	104.282	89.045	110.618	103.299	187.478
278.588	141.378	89.269	148.365	115.004	150.927
81.006	109.041	68.25	35.777	173.584	142.261
85.194	62.169	78.746	93.036	118.638	128.44
106.236	96.83	21.932	76.49	213.064	114.237
74.365	96.872	57.271	220.101	277.042	104.709
40.853	33.242	26	102.428	353.301	196.543
71.315	33.971	46.615	167.208	92.049	118.512
72.111	84.787	132.608	151.043	117.479	132.261
117.362	173.984	125.256	101.865	218.17	62.015
105.118	54.083	102.72	72.806	74.411	114.215
277.075	120.067	52.498	53.6	125.433	112.425
96.77	92.095	67.209	44.147	157.349	216.192
113.234	48.01	67.417	90.702	101.533	164.868
144.709	75.186	92.849	115.434	251.018	86.539
149.001	56.129	67.528	31.828	80.225	215.058
82.545	26.077	60	37.802	138.854	156.507
126.459	77.936	50.289	161.159	79.906	235.612
45.044	31.623	158.173	73.824	99.93	144.361
57.871	58.694	57.385	88.091	205.539	176.611
97.679	87.621	64.288	80.056	49.031	163.338
62.755	97.135	46	66.97	46.648	140.801
166.248	122.319	107.336	77.082	155.479	67.742
76.552	36.674	78.748	20.396	47.202	75.664
120.612	44.294	86.052	21.932	140.797	147.268
194.95	53.038	50.16	43.909	81.576	179.314
50.618	172.038	132.704	49.041	240.656	80.408
175.786	83.217	108.726	88.102	169.522	113.404
129.357	68.007	78.746	38.897	197.144	77.666
149.605	371.258	41.617	215.021	134.733	109.986
123.836	183.756	53.339	59.54	148.291	168.241
123.545	191.651	77.253	47.802	153.659	117.024
	66.4	44.721	72.236	183.519	114.039
	35.903	82.462	155.186	152.948	123.748
	29.428	101.119	140.288	164.012	60.671
	44.721	83.096	142.89	123.796	87.864
	61.098	35.609	116.488	277.072	193.752
	70.88		205.762	126.859	90.686
	107.551		48.836	84.248	43.863
	65.765		72.18	135.133	88.238
	246.682		178.115	88.589	129.027
	222.562		114.799	195.677
	195.539		139.844	122.269
	163.345		66.219	311.371
	191.4		115.609	256.86
	127.567		113.799	124.258
	96.364		95.755	197.4
	32.28		58.034	164.765
	76.942		173.73	67.366
	41.677		60.959	130.31
	57.689		82.807	88.495
	66.221		210.44	105.948
	188.481		63.506
	27.785		76.551
	100.281		135.063
	196.517		80.411
	111.426		146.957
	48.042		144.519
	91.18		217.329
	64.938		109.012
	102.212		181.543
	317.763		82.462
	137.801		55.356
	91.004		114.039
	82.492		123.693
	76.026		83.648
	235.661		231.815
	50.21		60.075
			114.935
			67.082
			160.321
			77.104
			76.4
			154.302
			166.065
			46.648
			94.021
			122.559
			134.164
			124.064
			156.019
			105.361
			270.472
			180.685
			101.393
			175.66
			115.033
			144.007
			175.638
			207.352
			128.742
			169.794
			122.495
			164.852
			45.607
			106.231
			124.808
			197.149
			155.781
			267.139
Table Analyzed	Data 1
Data sets analyzed	A-F
ANOVA summary
F	13.67
P value	<0.0001
P value summary	****
Significant diff. among means (P < 0.05)?	Yes
R square	0.1274
Brown-Forsythe test
F (DFn	DFd)	3.902 (5	468)
P value	0.0018
P value summary	**
Are SDs significantly different (P < 0.05)?	Yes
Bartlett's test
Bartlett's statistic (corrected)	41.06
P value	<0.0001
P value summary	****
Are SDs significantly different (P < 0.05)?	Yes
ANOVA table	SS	DF	MS	F (DFn	DFd)	P value
Treatment (between columns)	219206	5	43841	F (5	468) = 13.67	P<0.0001
Residual (within columns)	1501346	468	3208
Total	1720552	473
Data summary
Number of treatments (columns)	6
Number of values (total)	474
Number of families	1
Number of comparisons per family	15
Alpha	0.05
Tukey's multiple comparisons test	Mean Diff.	95.00% CI of diff.	Significant?	Summary	Adjusted P Value
WT vs. MMP14KO	15.82	-11.65 to 43.29	No	ns	0.5672	A-B
WT vs. MMP14OE	43.19	13.19 to 73.19	Yes	***	0.0006	A-C
WT vs. aCATKO	3.667	-22.43 to 29.76	No	ns	0.9986	A-D
WT vs. aCATKO-MMP14KO	-26.46	-55.00 to 2.088	No	ns	0.0871	A-E
WT vs. aCATKO-MMP14OE	-21.57	-51.12 to 7.981	No	ns	0.2949	A-F
MMP14KO vs. MMP14OE	27.37	0.6113 to 54.13	Yes	*	0.0416	B-C
MMP14KO vs. aCATKO	-12.15	-34.45 to 10.15	No	ns	0.6261	B-D
MMP14KO vs. aCATKO-MMP14KO	-42.27	-67.40 to -17.15	Yes	****	<0.0001	B-E
MMP14KO vs. aCATKO-MMP14OE	-37.39	-63.65 to -11.13	Yes	***	0.0008	B-F
MMP14OE vs. aCATKO	-39.52	-64.87 to -14.18	Yes	***	0.0001	C-D
MMP14OE vs. aCATKO-MMP14KO	-69.65	-97.51 to -41.78	Yes	****	<0.0001	C-E
MMP14OE vs. aCATKO-MMP14OE	-64.76	-93.65 to -35.87	Yes	****	<0.0001	C-F
aCATKO vs. aCATKO-MMP14KO	-30.12	-53.73 to -6.512	Yes	**	0.0039	D-E
aCATKO vs. aCATKO-MMP14OE	-25.24	-50.06 to -0.4181	Yes	*	0.0437	D-F
aCATKO-MMP14KO vs. aCATKO-MMP14OE	4.886	-22.50 to 32.27	No	ns	0.9958	E-F
Test details	Mean 1	Mean 2	Mean Diff.	SE of diff.	n1	n2	q	DF
WT vs. MMP14KO	115.5	99.66	15.82	9.6	56	92	2.33	468
WT vs. MMP14OE	115.5	72.29	43.19	10.48	56	61	5.827	468
WT vs. aCATKO	115.5	111.8	3.667	9.119	56	124	0.5688	468
WT vs. aCATKO-MMP14KO	115.5	141.9	-26.46	9.975	56	76	3.751	468
WT vs. aCATKO-MMP14OE	115.5	137	-21.57	10.33	56	65	2.954	468
MMP14KO vs. MMP14OE	99.66	72.29	27.37	9.352	92	61	4.139	468
MMP14KO vs. aCATKO	99.66	111.8	-12.15	7.794	92	124	2.205	468
MMP14KO vs. aCATKO-MMP14KO	99.66	141.9	-42.27	8.78	92	76	6.809	468
MMP14KO vs. aCATKO-MMP14OE	99.66	137	-37.39	9.177	92	65	5.761	468
MMP14OE vs. aCATKO	72.29	111.8	-39.52	8.858	61	124	6.31	468
MMP14OE vs. aCATKO-MMP14KO	72.29	141.9	-69.65	9.737	61	76	10.12	468
MMP14OE vs. aCATKO-MMP14OE	72.29	137	-64.76	10.1	61	65	9.071	468
aCATKO vs. aCATKO-MMP14KO	111.8	141.9	-30.12	8.251	124	76	5.163	468
aCATKO vs. aCATKO-MMP14OE	111.8	137	-25.24	8.673	124	65	4.115	468
aCATKO-MMP14KO vs. aCATKO-MMP14OE	141.9	137	4.886	9.569	76	65	0.7221	468

## Sheet: Fig7e width
WT	MMP14KO	MMP14OE	aCATKO	aCATKO-MMP14KO	aCATKO-MMP14OE
25.3827	12.5026	31.9211	20.9636	10.8404	21.093
13.3299	14.904	48.8583	14.6028	13.8632	17.5026
44.7885	14.8155	15.6667	15.82	19.4599	25.2489
16.3868	17.7841	24.3016	19.3191	21.7185	26.6578
22.7752	21.1014	35.1875	13.6667	14.89	15.461
18.0395	21.9367	40.8278	18.7582	18.06	15.7368
21.2174	25.1674	27.1852	16.675	19.6748	14.596
26.3933	11.8553	16.1875	26.0897	23.93	19.6062
25.5	16.1531	34.35	8.97753	16.5926	20.3633
40.9024	31.7907	53.8983	18.8782	21.0513	23.2215
23.7	14.3733	57.6567	23.8071	15.6429	20.587
12.4706	17.2692	21.2616	17.8435	18.2885	19.8222
12.9841	24.0943	32.4428	15.4753	18.1833	22.087
26.5102	14.7864	22.375	26.903	18.2528	6.48611
22.115	23.6913	19.9175	16.0721	17.4514	14.6215
26.7048	7.77333	62.9667	14.5551	17.5537	19.7563
20.8073	19.7683	20.0964	13.661	15.2686	18.978
10.6979	15.2037	73.6508	17.5935	19.4667	19.0177
21.1014	16.2212	45.5968	15.0962	20.673	15.7713
20.6609	26.2222	81.3188	13.5258	23.9936	23.2518
17.7952	19.8138	37		14.3233	20.8566
17.792	15.993	20.75			15.3433
16.307	18.7333	20.8393			15.7826
	12.5766	43.5806
		47.6522
		17.8367
		40.0976
		26.6256
Table Analyzed	Data 1
Data sets analyzed	A-F
ANOVA summary
F	16.62
P value	<0.0001
P value summary	****
Significant diff. among means (P < 0.05)?	Yes
R square	0.3845
Brown-Forsythe test
F (DFn	DFd)	13.06 (5	133)
P value	<0.0001
P value summary	****
Are SDs significantly different (P < 0.05)?	Yes
Bartlett's test
Bartlett's statistic (corrected)	97.74
P value	<0.0001
P value summary	****
Are SDs significantly different (P < 0.05)?	Yes
ANOVA table	SS	DF	MS	F (DFn	DFd)	P value
Treatment (between columns)	7155	5	1431	F (5	133) = 16.62	P<0.0001
Residual (within columns)	11454	133	86.12
Total	18609	138
Data summary
Number of treatments (columns)	6
Number of values (total)	139
Number of families	1
Number of comparisons per family	15
Alpha	0.05
Tukey's multiple comparisons test	Mean Diff.	95.00% CI of diff.	Significant?	Summary	Adjusted P Value
WT vs. MMP14KO	3.823	-4.007 to 11.65	No	ns	0.7198	A-B
WT vs. MMP14OE	-14.5	-22.05 to -6.950	Yes	****	<0.0001	A-C
WT vs. aCATKO	4.515	-3.690 to 12.72	No	ns	0.6058	A-D
WT vs. aCATKO-MMP14KO	3.873	-4.227 to 11.97	No	ns	0.7374	A-E
WT vs. aCATKO-MMP14OE	3.153	-4.761 to 11.07	No	ns	0.8584	A-F
MMP14KO vs. MMP14OE	-18.32	-25.79 to -10.86	Yes	****	<0.0001	B-C
MMP14KO vs. aCATKO	0.6913	-7.434 to 8.816	No	ns	0.9999	B-D
MMP14KO vs. aCATKO-MMP14KO	0.04933	-7.969 to 8.068	No	ns	>0.9999	B-E
MMP14KO vs. aCATKO-MMP14OE	-0.6706	-8.501 to 7.160	No	ns	0.9999	B-F
MMP14OE vs. aCATKO	19.02	11.16 to 26.87	Yes	****	<0.0001	C-D
MMP14OE vs. aCATKO-MMP14KO	18.37	10.63 to 26.12	Yes	****	<0.0001	C-E
MMP14OE vs. aCATKO-MMP14OE	17.65	10.10 to 25.21	Yes	****	<0.0001	C-F
aCATKO vs. aCATKO-MMP14KO	-0.6419	-9.027 to 7.743	No	ns	>0.9999	D-E
aCATKO vs. aCATKO-MMP14OE	-1.362	-9.567 to 6.843	No	ns	0.9968	D-F
aCATKO-MMP14KO vs. aCATKO-MMP14OE	-0.7199	-8.820 to 7.380	No	ns	0.9998	E-F
Test details	Mean 1	Mean 2	Mean Diff.	SE of diff.	n1	n2	q	DF
WT vs. MMP14KO	21.93	18.11	3.823	2.708	23	24	1.997	133
WT vs. MMP14OE	21.93	36.43	-14.5	2.612	23	28	7.853	133
WT vs. aCATKO	21.93	17.41	4.515	2.837	23	20	2.25	133
WT vs. aCATKO-MMP14KO	21.93	18.06	3.873	2.801	23	21	1.955	133
WT vs. aCATKO-MMP14OE	21.93	18.78	3.153	2.737	23	23	1.629	133
MMP14KO vs. MMP14OE	18.11	36.43	-18.32	2.582	24	28	10.04	133
MMP14KO vs. aCATKO	18.11	17.41	0.6913	2.81	24	20	0.3479	133
MMP14KO vs. aCATKO-MMP14KO	18.11	18.06	0.04933	2.773	24	21	0.02516	133
MMP14KO vs. aCATKO-MMP14OE	18.11	18.78	-0.6706	2.708	24	23	0.3502	133
MMP14OE vs. aCATKO	36.43	17.41	19.02	2.717	28	20	9.898	133
MMP14OE vs. aCATKO-MMP14KO	36.43	18.06	18.37	2.679	28	21	9.7	133
MMP14OE vs. aCATKO-MMP14OE	36.43	18.78	17.65	2.612	28	23	9.56	133
aCATKO vs. aCATKO-MMP14KO	17.41	18.06	-0.6419	2.9	20	21	0.3131	133
aCATKO vs. aCATKO-MMP14OE	17.41	18.78	-1.362	2.837	20	23	0.6788	133
aCATKO-MMP14KO vs. aCATKO-MMP14OE	18.06	18.78	-0.7199	2.801	21	23	0.3635	133
