# Supplementary material for: Interplay of adherens junctions and matrix proteolysis determines the invasive pattern and growth of squamous cell carcinoma
Source: eLife. 2023 Mar 9;12:e76520. doi: 10.7554/eLife.76520 (PMC9998089; doi:10.7554/eLife.76520)
Supplement: Figure 8—source data 1. [file elife-76520-fig8-data1.xlsx]

## Sheet: Fig8C
	WT	WT	WT	WT	WT	WT	WT	WT	WT	WT	WT	WT	WT	WT	WT	WT	MMP14KO	MMP14KO	MMP14KO	MMP14KO	MMP14KO	MMP14KO	MMP14KO	MMP14KO	MMP14KO	MMP14KO	MMP14KO	MMP14KO	MMP14KO	MMP14KO	MMP14KO	MMP14KO	MMP14KO	MMP14OE	MMP14OE	MMP14OE	MMP14OE	MMP14OE	MMP14OE	MMP14OE	MMP14OE	MMP14OE	MMP14OE	MMP14OE	MMP14OE	MMP14OE	MMP14OE	MMP14OE	MMP14OE
4	3.87833e+06	3.2873e+06	3.72489e+06	3.84052e+06	2.05875e+06	3.57797e+06	6.40721e+06	5.32279e+06	3.99666e+06	1.90028e+06	1.25278e+06	1.11641e+06	2.01491e+06	2.06002e+06	6.31543e+06	5.82709e+06	578987	1.30984e+06	2.95056e+06	2.24745e+06	541525	1.4288e+06	819181	1.3922e+06	1.57697e+06	1.41926e+06	922038	819216	567555	431776	908474	271123	666984	1.0842e+07	5.54543e+06	5.10009e+06	1.49053e+07	6.68721e+06	6.15142e+06	5.84988e+06	7.24181e+06	4.10189e+06	3.58744e+06	3.59439e+06	5.3538e+06	2.12478e+06	3.19501e+06	4.67683e+06	4.8656e+06
6	1.98963e+07	2.26554e+07	1.29255e+07	1.73471e+07	2.98998e+07	1.16871e+07	2.65287e+07	1.81856e+07	2.70063e+07	4.03677e+07	7.24567e+06	5.53919e+06	6.35819e+06	5.88354e+06	7.34643e+06	6.11249e+06	3.26945e+06	1.84259e+06	4.2812e+06	2.72718e+06	3.82709e+06	2.69934e+06	394098	6.96279e+06	3.75673e+06	3.19658e+06	852955	83947.4	1.20282e+06	874215	186971	1.3321e+06	2.24162e+06	3.06503e+07	31645451	2.07094e+07	4.09473e+07	3.7166e+07	3.15786e+07	4.88812e+07	5.65601e+07	3.94466e+07	1.70177e+07	2.41954e+07	2.3538e+07	1.708e+07	2.33412e+07	1.05837e+07	2.72144e+07
8	4.68181e+07	5.2484e+07	7.36431e+07	5.05783e+07	6.37461e+07	2.12408e+07	1.97405e+07	6.19588e+07	2.00478e+07	5.27856e+07	4.24354e+07	2.71026e+07	2.268e+07	2.82797e+07	1.23075e+07	6.43984e+06	6.15708e+06	3.22069e+06	5.25962e+06	3.66882e+06	7.87978e+06	3.68851e+06	376587	1.54439e+06	1.3968e+06	3.31134e+06	376407	608248	423873	787418	320343	1.99032e+06	1.56191e+06	1.61982e+08	270293182	2.05885e+07	1.51064e+08	6.56699e+07	218322653	4.82351e+07	168219748	8.16323e+07	4.18975e+08	1.61914e+08	6.20926e+07	6.33184e+07	2.75508e+07	7.32012e+07	6.85983e+07
Table Analyzed	Data 1
Two-way ANOVA	Ordinary
Alpha	0.05
Source of Variation	% of total variation	P value	P value summary	Significant?
Interaction	24.24	<0.0001	****	Yes
Row Factor	10.74	<0.0001	****	Yes
Column Factor	25.01	<0.0001	****	Yes
ANOVA table	SS (Type III)	DF	MS	F (DFn	DFd)	P value
Interaction	1.079e+17	10	1.079e+16	F (10	342) = 19.45	P<0.0001
Row Factor	4.782e+16	2	2.391e+16	F (2	342) = 43.09	P<0.0001
Column Factor	1.113e+17	5	2.227e+16	F (5	342) = 40.12	P<0.0001
Residual	1.898e+17	342	555000000000000
Within each row	compare columns (simple effects within rows)
Number of families	3
Number of comparisons per family	15
Alpha	0.05
Tukey's multiple comparisons test	Predicted (LS) mean diff.	95.00% CI of diff.	Significant?	Summary	Adjusted P Value
4
WT vs. MMP14KO	2427396	-21089595 to 25944388	No	ns	0.9997
WT vs. MMP14OE	-2179950	-25696942 to 21337042	No	ns	0.9998
WT vs. aCATKO	2250109	-19050970 to 23551188	No	ns	0.9997
WT vs. aCATKO-MMP14KO	2864968	-19318514 to 25048450	No	ns	0.9991
WT vs. aCATKO-MMP14OE	944849	-21459921 to 23349618	No	ns	>0.9999
MMP14KO vs. MMP14OE	-4607347	-27765279 to 18550586	No	ns	0.9929
MMP14KO vs. aCATKO	-177288	-21081281 to 20726705	No	ns	>0.9999
MMP14KO vs. aCATKO-MMP14KO	437572	-21364901 to 22240044	No	ns	>0.9999
MMP14KO vs. aCATKO-MMP14OE	-1482548	-23510136 to 20545040	No	ns	>0.9999
MMP14OE vs. aCATKO	4430059	-16473934 to 25334052	No	ns	0.9905
MMP14OE vs. aCATKO-MMP14KO	5044918	-16757555 to 26847391	No	ns	0.9858
MMP14OE vs. aCATKO-MMP14OE	3124799	-18902789 to 25152387	No	ns	0.9986
aCATKO vs. aCATKO-MMP14KO	614859	-18776760 to 20006478	No	ns	>0.9999
aCATKO vs. aCATKO-MMP14OE	-1305260	-20949641 to 18339121	No	ns	>0.9999
aCATKO-MMP14KO vs. aCATKO-MMP14OE	-1920119	-22517998 to 18677759	No	ns	0.9998
6
WT vs. MMP14KO	14224408	-9292584 to 37741400	No	ns	0.5106
WT vs. MMP14OE	-13251838	-36768830 to 10265154	No	ns	0.5892
WT vs. aCATKO	13473058	-7828021 to 34774137	No	ns	0.4589
WT vs. aCATKO-MMP14KO	14935804	-7247678 to 37119286	No	ns	0.3858
WT vs. aCATKO-MMP14OE	11490775	-10913994 to 33895544	No	ns	0.6838
MMP14KO vs. MMP14OE	-27476246	-50634179 to -4318313	Yes	**	0.0097
MMP14KO vs. aCATKO	-751350	-21655343 to 20152643	No	ns	>0.9999
MMP14KO vs. aCATKO-MMP14KO	711396	-21091077 to 22513869	No	ns	>0.9999
MMP14KO vs. aCATKO-MMP14OE	-2733633	-24761221 to 19293954	No	ns	0.9992
MMP14OE vs. aCATKO	26724896	5820903 to 47628889	Yes	**	0.0039
MMP14OE vs. aCATKO-MMP14KO	28187642	6385169 to 49990115	Yes	**	0.0033
MMP14OE vs. aCATKO-MMP14OE	24742613	2715025 to 46770200	Yes	*	0.0175
aCATKO vs. aCATKO-MMP14KO	1462746	-17928873 to 20854365	No	ns	>0.9999
aCATKO vs. aCATKO-MMP14OE	-1982284	-21626664 to 17662097	No	ns	0.9997
aCATKO-MMP14KO vs. aCATKO-MMP14OE	-3445029	-24042908 to 17152849	No	ns	0.9968
8
WT vs. MMP14KO	35138775	11621783 to 58655767	Yes	***	0.0003
WT vs. MMP14OE	-86565341	-110082332 to -63048349	Yes	****	<0.0001
WT vs. aCATKO	35550193	14249113 to 56851272	Yes	****	<0.0001
WT vs. aCATKO-MMP14KO	35734211	13550729 to 57917693	Yes	****	<0.0001
WT vs. aCATKO-MMP14OE	24964782	2560013 to 47369551	Yes	*	0.019
MMP14KO vs. MMP14OE	-121704115	-144862048 to -98546183	Yes	****	<0.0001
MMP14KO vs. aCATKO	411418	-20492575 to 21315410	No	ns	>0.9999
MMP14KO vs. aCATKO-MMP14KO	595436	-21207037 to 22397909	No	ns	>0.9999
MMP14KO vs. aCATKO-MMP14OE	-10173993	-32201581 to 11853595	No	ns	0.7717
MMP14OE vs. aCATKO	122115533	101211540 to 143019526	Yes	****	<0.0001
MMP14OE vs. aCATKO-MMP14KO	122299551	100497078 to 144102024	Yes	****	<0.0001
MMP14OE vs. aCATKO-MMP14OE	111530123	89502535 to 133557710	Yes	****	<0.0001
aCATKO vs. aCATKO-MMP14KO	184018	-19207601 to 19575637	No	ns	>0.9999
aCATKO vs. aCATKO-MMP14OE	-10585410	-30229791 to 9058970	No	ns	0.6358
aCATKO-MMP14KO vs. aCATKO-MMP14OE	-10769429	-31367307 to 9828450	No	ns	0.6655
Test details	Predicted (LS) mean 1	Predicted (LS) mean 2	Predicted (LS) mean diff.	SE of diff.	N1	N2	q	DF
4
WT vs. MMP14KO	3536334	1108938	2427396	8205647	16	17	0.4184	342
WT vs. MMP14OE	3536334	5716285	-2179950	8205647	16	17	0.3757	342
WT vs. aCATKO	3536334	1286226	2250109	7432461	16	27	0.4281	342
WT vs. aCATKO-MMP14KO	3536334	671366	2864968	7740353	16	22	0.5234	342
WT vs. aCATKO-MMP14OE	3536334	2591486	944849	7817565	16	21	0.1709	342
MMP14KO vs. MMP14OE	1108938	5716285	-4607347	8080362	17	17	0.8064	342
MMP14KO vs. aCATKO	1108938	1286226	-177288	7293908	17	27	0.03437	342
MMP14KO vs. aCATKO-MMP14KO	1108938	671366	437572	7607410	17	22	0.08134	342
MMP14KO vs. aCATKO-MMP14OE	1108938	2591486	-1482548	7685958	17	21	0.2728	342
MMP14OE vs. aCATKO	5716285	1286226	4430059	7293908	17	27	0.8589	342
MMP14OE vs. aCATKO-MMP14KO	5716285	671366	5044918	7607410	17	22	0.9378	342
MMP14OE vs. aCATKO-MMP14OE	5716285	2591486	3124799	7685958	17	21	0.575	342
aCATKO vs. aCATKO-MMP14KO	1286226	671366	614859	6766205	27	22	0.1285	342
aCATKO vs. aCATKO-MMP14OE	1286226	2591486	-1305260	6854399	27	21	0.2693	342
aCATKO-MMP14KO vs. aCATKO-MMP14OE	671366	2591486	-1920119	7187098	22	21	0.3778	342
6
WT vs. MMP14KO	16561565	2337157	14224408	8205647	16	17	2.452	342
WT vs. MMP14OE	16561565	29813403	-13251838	8205647	16	17	2.284	342
WT vs. aCATKO	16561565	3088506	13473058	7432461	16	27	2.564	342
WT vs. aCATKO-MMP14KO	16561565	1625761	14935804	7740353	16	22	2.729	342
WT vs. aCATKO-MMP14OE	16561565	5070790	11490775	7817565	16	21	2.079	342
MMP14KO vs. MMP14OE	2337157	29813403	-27476246	8080362	17	17	4.809	342
MMP14KO vs. aCATKO	2337157	3088506	-751350	7293908	17	27	0.1457	342
MMP14KO vs. aCATKO-MMP14KO	2337157	1625761	711396	7607410	17	22	0.1322	342
MMP14KO vs. aCATKO-MMP14OE	2337157	5070790	-2733633	7685958	17	21	0.503	342
MMP14OE vs. aCATKO	29813403	3088506	26724896	7293908	17	27	5.182	342
MMP14OE vs. aCATKO-MMP14KO	29813403	1625761	28187642	7607410	17	22	5.24	342
MMP14OE vs. aCATKO-MMP14OE	29813403	5070790	24742613	7685958	17	21	4.553	342
aCATKO vs. aCATKO-MMP14KO	3088506	1625761	1462746	6766205	27	22	0.3057	342
aCATKO vs. aCATKO-MMP14OE	3088506	5070790	-1982284	6854399	27	21	0.409	342
aCATKO-MMP14KO vs. aCATKO-MMP14OE	1625761	5070790	-3445029	7187098	22	21	0.6779	342
8
WT vs. MMP14KO	37643018	2504243	35138775	8205647	16	17	6.056	342
WT vs. MMP14OE	37643018	124208358	-86565341	8205647	16	17	14.92	342
WT vs. aCATKO	37643018	2092825	35550193	7432461	16	27	6.764	342
WT vs. aCATKO-MMP14KO	37643018	1908807	35734211	7740353	16	22	6.529	342
WT vs. aCATKO-MMP14OE	37643018	12678236	24964782	7817565	16	21	4.516	342
MMP14KO vs. MMP14OE	2504243	124208358	-121704115	8080362	17	17	21.3	342
MMP14KO vs. aCATKO	2504243	2092825	411418	7293908	17	27	0.07977	342
MMP14KO vs. aCATKO-MMP14KO	2504243	1908807	595436	7607410	17	22	0.1107	342
MMP14KO vs. aCATKO-MMP14OE	2504243	12678236	-10173993	7685958	17	21	1.872	342
MMP14OE vs. aCATKO	124208358	2092825	122115533	7293908	17	27	23.68	342
MMP14OE vs. aCATKO-MMP14KO	124208358	1908807	122299551	7607410	17	22	22.74	342
MMP14OE vs. aCATKO-MMP14OE	124208358	12678236	111530123	7685958	17	21	20.52	342
aCATKO vs. aCATKO-MMP14KO	2092825	1908807	184018	6766205	27	22	0.03846	342
aCATKO vs. aCATKO-MMP14OE	2092825	12678236	-10585410	6854399	27	21	2.184	342
aCATKO-MMP14KO vs. aCATKO-MMP14OE	1908807	12678236	-10769429	7187098	22	21	2.119	342
[truncated: 71 more columns]
