# Supplementary material for: Interplay of adherens junctions and matrix proteolysis determines the invasive pattern and growth of squamous cell carcinoma
Source: eLife. 2023 Mar 9;12:e76520. doi: 10.7554/eLife.76520 (PMC9998089; doi:10.7554/eLife.76520)
Supplement: Figure 9—figure supplement 1—source data 1. [file elife-76520-fig9-figsupp1-data1.xlsx]

## Sheet: Figure 9 - figure supplement 1b
	Invaded distance	Aspect Ratio	Invaded distance x area
CTR	212.062	1.144	13137.7
	179.496	2.218	62168.4
	162.253	1.775	31475
	175.609	2.959	105563
	105.492	1.273	36680.2
	15.037	1.1	1682.66
	18.94	1.025	1584.05
	35.735	1.464	6178.05
	174.56	1.576	1.00235e+06
	84.48	1.668	897106
	31.252	1.411	13504.5
	26.594	1.396	8428.25
	99.717	1.51	26274.4
	141.027	1.139	21651.2
	238.727	1.861	32722.1
	285.804	4.087	66287.4
	67.928	1.411	26051.9
	80.087	2.826	30032.9
	88.597	1.194	7993.04
	40.759	1.798	10676.5
	187.597	2.236	59671.8
	187.894	2.086	82828.7
	250.538	5.175	52384.5
	232.235	1.695	6879.03
	305.108	1.346	13113.2
	276.239	1.286	17755.3
	179.689	2.845	11723.4
	90.423	1.296	10836.1
	168.981	1.815	100925
	196.437	1.927	42479.7
	31.169	2.21	17137.5
	29.411	1.072	3473.32
	248.218	1.294	327591
	98.475	2.631	5319.03
	27.779	1.563	9282.46
	192.594	1.403	1.09029e+06
	118.93	3.124	54039.3
	74.146	2.467	9373.61
	43.156	1.922	21589.3
CTNNA1	243.468	3.321	87624.6
	169.736	1.09	35391.1
	167.387	1.729	123500
	138.464	3.77	164217
	38.207	5.447	22752.8
	117.176	3.373	31328.4
	129.132	1.07	9150.04
	12.76	2.038	1415.51
	12.76	2.705	1403.15
	17.622	1.274	7188.28
	157.697	1.516	24821
	274.701	1.791	18667
MMP14OE	129.765	1.591	187389
	67.02	1.113	633197
	102.874	1.268	531390
	23.975	2.32	6228.97
	498.862	1.848	1.84689e+06
	333.803	1.521	136163
	346.77	1.257	46524.4
	739.516	1.418	96210.3
	216.083	1.751	78521.8
	78.123	1.241	12961.8
	416.292	1.757	1.28612e+06
	435.654	1.128	252184
	287.669	1.135	365122
	211.259	2.125	63721.8
	168.191	2.459	55127.1
	26.764	1.348	5393.96
	419.232	1.382	651417
	292.356	1.478	425463
	232.801	1.938	350421
	737.672	1.507	470141
	646.265	1.282	111354
	316.952	1.512	250602
	306.024	3.665	78441.9
	37.036	2.816	10425.4
	46.673	1.31	44248.8
	21.564	1.081	7773.46
MMP14KO	41.369	3.409	19902.5
	105.674	1.373	8715.36
	40.523	1.214	4361.98
	5.92	4.051	2197.1
