# Supplementary material for: Interplay of adherens junctions and matrix proteolysis determines the invasive pattern and growth of squamous cell carcinoma
Source: eLife. 2023 Mar 9;12:e76520. doi: 10.7554/eLife.76520 (PMC9998089; doi:10.7554/eLife.76520)
Supplement: Figure 9—source data 1. [file elife-76520-fig9-data1.xlsx]

## Sheet: Fig9b
Day	WT	WT	WT	WT	WT	WT	MMP14KO	MMP14KO	MMP14KO	MMP14OE	MMP14OE	MMP14OE	MMP14OE	MMP14OE	MMP14OE	MMP14OE	aCATKO	aCATKO	aCATKO	aCATKO-MMP14KO	aCATKO-MMP14KO	aCATKO-MMP14KO	aCATKO-MMP14KO	aCATKO-MMP14OE	aCATKO-MMP14OE	aCATKO-MMP14OE	aCATKO-MMP14OE	aCATKO-MMP14OE	aCATKO-MMP14OE	aCATKO-MMP14OE
7	0.252	0.245	0.1375							0.1715	0.847	1.05	0.584	1.183										0.1
11	0.972	1.666	1.089	0.436	0.2205		0.032			0.81	1.584	4.624	1.47	4.1905	0.1715	0.5455	0.108			0.0625	0.256	0.32		0.0625	0.032	0.0625	0.567
14	4.5125	22.542	10.478	6.912	5.67		0.256			10.051	22.5835	24.624	17.1315	32.4	4.374	7.776	0.4455	0.1715		0.256	0.416	0.405		0.294	0.108	1.0285	3.888	0.567
17	11.232	38.663	23.8875	15.138	14.58		0.5			21.15	42.471	41.067	26.95	53.802	5.0715	16.875	0.384	0.4455		0.3645	0.9075	0.7		1.0985	1.1495	3.2	11.368	2.058
21	38.148	39.5035	24.025	20.25	24.025		1.47			60.0925	83.232	85.248	72.9	145.824	41.7545	42.12	1.372	0.864		0.6655	1.183	1.568		1.862	1.21	8.75	15.288	4.1905	1.08	0.65
25	164.714	83.248	78.652	39.204	44	1.372	4.4										1.183	1.666		0.55	0.936	2.8125		5.184	2.548	15.979	50.625	6.05	2.1375	1.296
28							3.7905	0.7									2.7885	4.1515	0.5	1.2675	1.183	8.464		10.89	6.2	30.634	114.873	14.7175	5.9245	3.6
32							6.2	0.7865									6.0835	6.137	0.6	1.6875	2.432	18.9	0.6655	26.588	11.492	119.072	147.875	49.923	13.75	5.022
35							8.228	1.2675									7.2	6.6125	0.864	3.564	2.4565	28.175	0.864
38							11.232	1.764	0.196								13.182	10.206	1.008	5	2.7455	32.4	0.936
Table Analyzed	WT vs MOE
Two-way ANOVA	Ordinary
Alpha	0.05
Source of Variation	% of total variation	P value	P value summary	Significant?
Interaction	10.05	0.002	**	Yes
Row Factor	49.95	<0.0001	****	Yes
Column Factor	5.536	0.0018	**	Yes
ANOVA table	SS (Type III)	DF	MS	F (DFn	DFd)	P value
Interaction	4344	4	1086	F (4	50) = 4.941	P=0.0020
Row Factor	21586	4	5396	F (4	50) = 24.55	P<0.0001
Column Factor	2393	1	2393	F (1	50) = 10.89	P=0.0018
Residual	10989	50	219.8
Difference between column means
Predicted (LS) mean of WT	12.18
Predicted (LS) mean of MOE	24.99
Difference between predicted means	-12.81
SE of difference	3.882
95% CI of difference	-20.61 to -5.011
Compare each cell mean with the other cell mean in that row
Number of families	1
Number of comparisons per family	5
Alpha	0.05
Sidak's multiple comparisons test	Mean Diff.	95.00% CI of diff.	Significant?	Summary	Adjusted P Value
WT - MOE
7	-0.421	-23.60 to 22.76	No	ns	>0.9999
11	-1.037	-24.21 to 22.14	No	ns	>0.9999
14	-6.969	-30.15 to 16.21	No	ns	0.9376
17	-8.927	-32.10 to 14.25	No	ns	0.8422
21	-46.69	-69.87 to -23.51	Yes	****	<0.0001
Test details	Mean 1	Mean 2	Mean Diff.	SE of diff.	N1	N2	t	DF
WT - MOE
7	0.1269	0.5479	-0.421	8.681	5	7	0.0485	50
11	0.8767	1.914	-1.037	8.681	5	7	0.1195	50
14	10.02	16.99	-6.969	8.681	5	7	0.8028	50
17	20.7	29.63	-8.927	8.681	5	7	1.028	50
21	29.19	75.88	-46.69	8.681	5	7	5.379	50
Table Analyzed	WT vs aKOMOE
Two-way ANOVA	Ordinary
Alpha	0.05
Source of Variation	% of total variation	P value	P value summary	Significant?
Interaction	15.73	0.0009	***	Yes
Row Factor	32.29	<0.0001	****	Yes
Column Factor	11.56	<0.0001	****	Yes
ANOVA table	SS (Type III)	DF	MS	F (DFn	DFd)	P value
Interaction	7172	5	1434	F (5	66) = 4.758	P=0.0009
Row Factor	14725	5	2945	F (5	66) = 9.768	P<0.0001
Column Factor	5272	1	5272	F (1	66) = 17.49	P<0.0001
Residual	19898	66	301.5
Difference between column means
Predicted (LS) mean of Group A	19.88
Predicted (LS) mean of Group B	3.391
Difference between predicted means	16.49
SE of difference	3.944
95% CI of difference	8.617 to 24.37
Compare each cell mean with the other cell mean in that row
Number of families	1
Number of comparisons per family	6
Alpha	0.05
Sidak's multiple comparisons test	Mean Diff.	95.00% CI of diff.	Significant?	Summary	Adjusted P Value
Group A - Group B
7	0.09146	-26.11 to 26.29	No	ns	>0.9999
11	0.6272	-25.57 to 26.83	No	ns	>0.9999
14	7.512	-18.69 to 33.71	No	ns	0.969
17	14.55	-11.65 to 40.75	No	ns	0.586
21	19.61	-6.594 to 45.81	No	ns	0.2482
25	56.56	30.36 to 82.76	Yes	****	<0.0001
Test details	Mean 1	Mean 2	Mean Diff.	SE of diff.	N1	N2	t	DF
Group A - Group B
7	0.1057	0.01429	0.09146	9.66	6	7	0.009468	66
11	0.7306	0.1034	0.6272	9.66	6	7	0.06492	66
14	8.352	0.8408	7.512	9.66	6	7	0.7776	66
17	17.25	2.696	14.55	9.66	6	7	1.507	66
21	24.33	4.719	19.61	9.66	6	7	2.03	66
25	68.53	11.97	56.56	9.66	6	7	5.855	66

## Sheet: Fig9c
	WT	MKO	MOE	aKO	aKO	aKO
					MKO	MOE
Mice with metastasis	3	1	8	1	1	2
Mice bearing tumour	8	5	9	5	6	6
Total mice injected	14	20	13	21	20	12
